# Supplementary material
Source: publisher site journal article supplement (https://www.dovepress.com/get_supplementary_file.php?f=468209.docx)
Supplement: Supplementary file 1 [file get_supplementary_file.php]

Supplementary Table 1. Detailed Breakdown of Risk Factor Patterns in Middle Eastern Young Women with ASCVD and Controls.

|  | ASCVD women  (n=209) | Control women  (n=418) | Total  (n=627) | p-value |
| --- | --- | --- | --- | --- |
| FIRST: Seven Traditional RF |  | | | |
| Presence of 0 RF | 0 | 21 (5.02%) | 21 | 0.002 |
| Presence of 1 RF | 21 (10.05%) | 105 (25.12%) | 126 (20.10%) | <0.001 |
| Presence of 2 RF | 23 (11.00%) | 139 (33.25%) | 162 (25.84%) | <0.001 |
| Presence of 3 RF | 58 (27.75%) | 88 (21.05%) | 146 (23.29%) | 0.061 |
| Presence of 4 RF | 48 (22.97%) | 47 (11.24%) | 95 (15.15%) | <0.001 |
| Presence of 5 RF | 37 (17.70%) | 14 (3.35%) | 51 (8.13%) | <0.001 |
| Presence of 6 RF | 17 (8.13%) | 4 (0.96%) | 21 (3.35%) | <0.001 |
| Presence of 7 RF | 5 (2.39%) | 0 (0%) | 5 (0.80%) | 0.001 |
| SECOND: Four SMuRFs HTN/DM/Cigarette smoking/LDL |  | | | |
| Presence of 1 RF | 59 (28.23%) | 145 (34.69%) | 204 (32.54%) | 0.104 |
| Presence of 2 RF | 73 (34.93%) | 81 (19.38%) | 154 (24.56%) | <0.001 |
| Presence of 3 RF | 40 (19.14%) | 13 (3.11%) | 53 (8.45%) | <0.001 |
| Presence of 4 RF | 18 (8.61%) | 1 (0.24%) | 19 (3.03%) | <0.001 |
| THIRD: Eight Sex-related RF |  | | | |
| Presence of 0 RF | 73 (34.9%) | 165 (39.5%) |  | 0.302 |
| Presence of 1 RF | 70 (33.5%) | 155 (37.1%) | 225 (35.9%) | 0.377 |
| Presence of 2 RF | 45 (21.5%) | 70 (16.8%) | 115 (18.3%) | 0.144 |
| Presence of 3 RF | 13 (6.2%) | 19 (4.6%) | 32 (5.1%) | 0.369 |
| Presence of 4 RF | 6 (2.9%) | 9 (2.2%) | 15 (2.4%) | 0.579 |
| Presence of 5 RF | 1 (0.5%) | 0 (0%) | 1 (0.7%) | 0.157 |
| Presence of 6 RF | 1 (0.5%) | 0 (0%) | 1 (0.2%) | 0.157 |
| Presence of 7 RF | 0 (0%) | 0 (0%) | 0 (0%) | - |
| Presence of 8 RF | 0 (0%) | 0 (0%) | 0 (0%) | - |
| FOURTH: Four Socioeconomic RF |  | | | |
| Presence of 0 RF | 2 (1.0%) | 0 |  | 0.189 |
| Presence of 1 RF | 30 (14.4%) | 95 (22.7%) | 125 (19.9%) | 0.013 |
| Presence of 2 RF | 95 (45.5%) | 223 (53.4%) | 318 (50.7%) | 0.062 |
| Presence of 3 RF | 77 (36.8%) | 85 (20.3%) | 162 (25.8%) | <0.001 |
| Presence of 4 RF | 5 (2.4%) | 6 (1.4%) | 11 (1.8%) | 0.390 |
